# Supplementary material
Source: Springer Nature journal article supplement (https://www.springermedizin.de/resource/supplementary/12885_2011_3057_MOESM4_ESM.pdf/9464184)

**A**

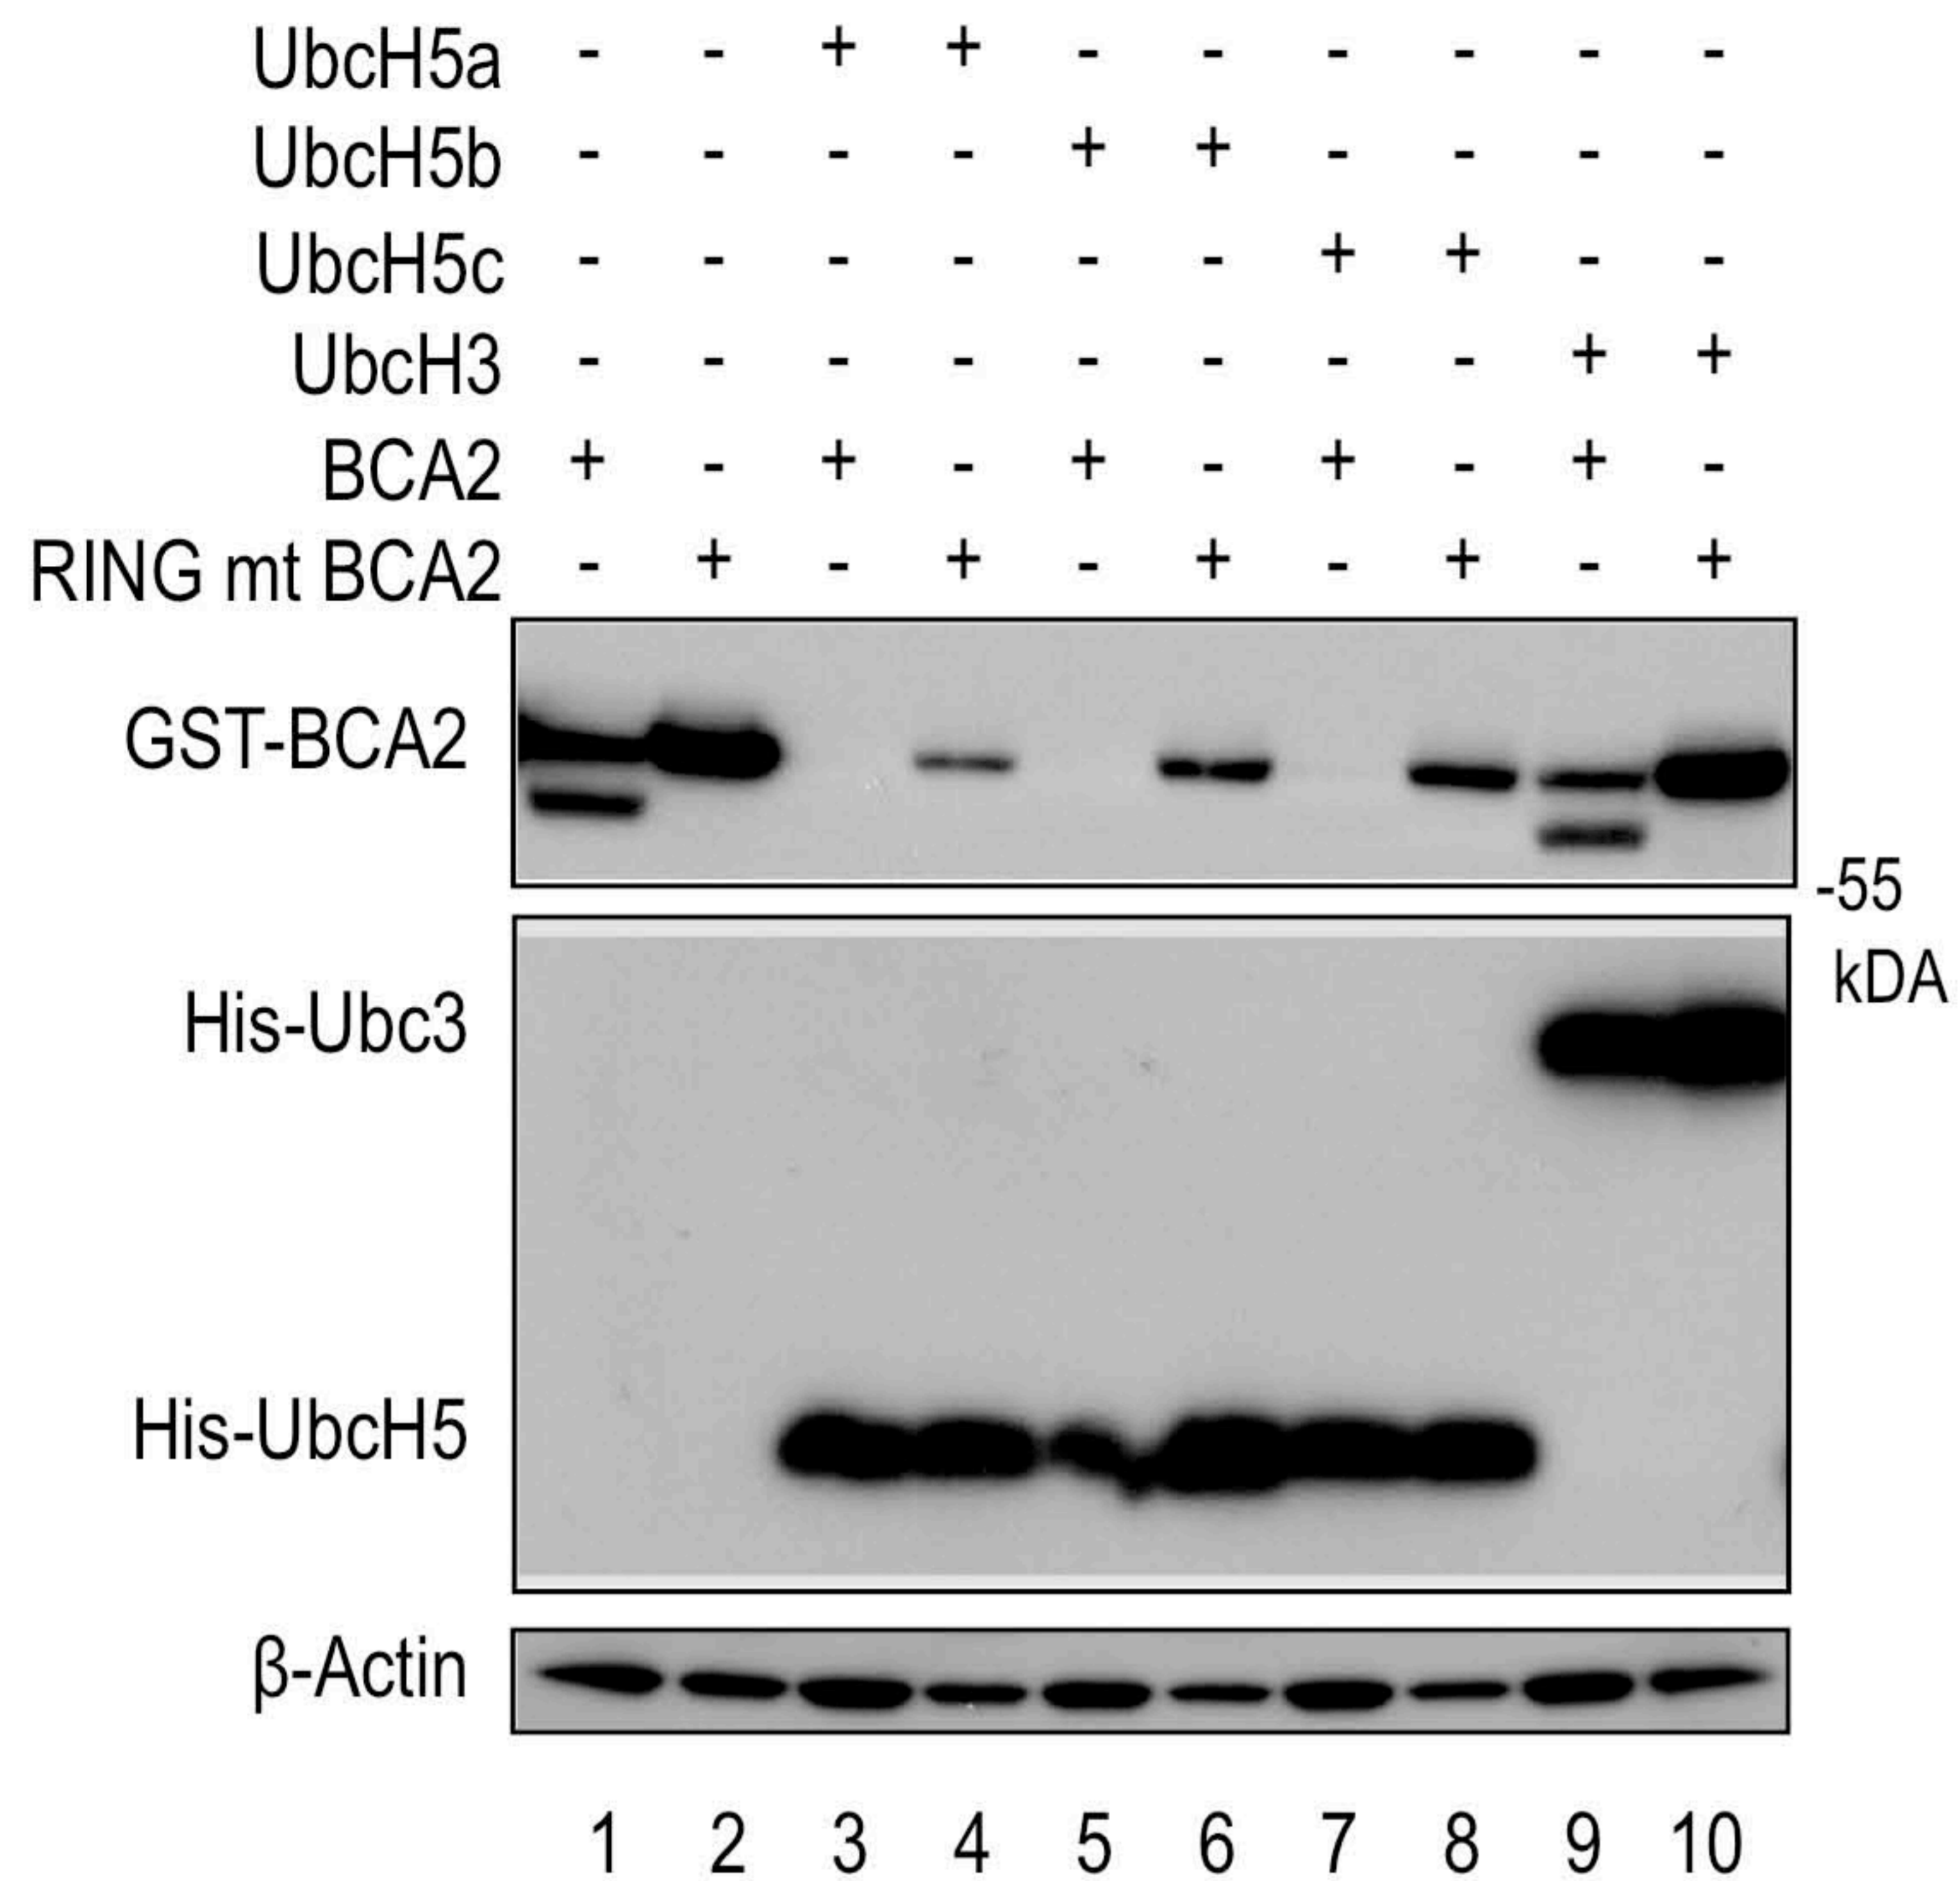

**B**

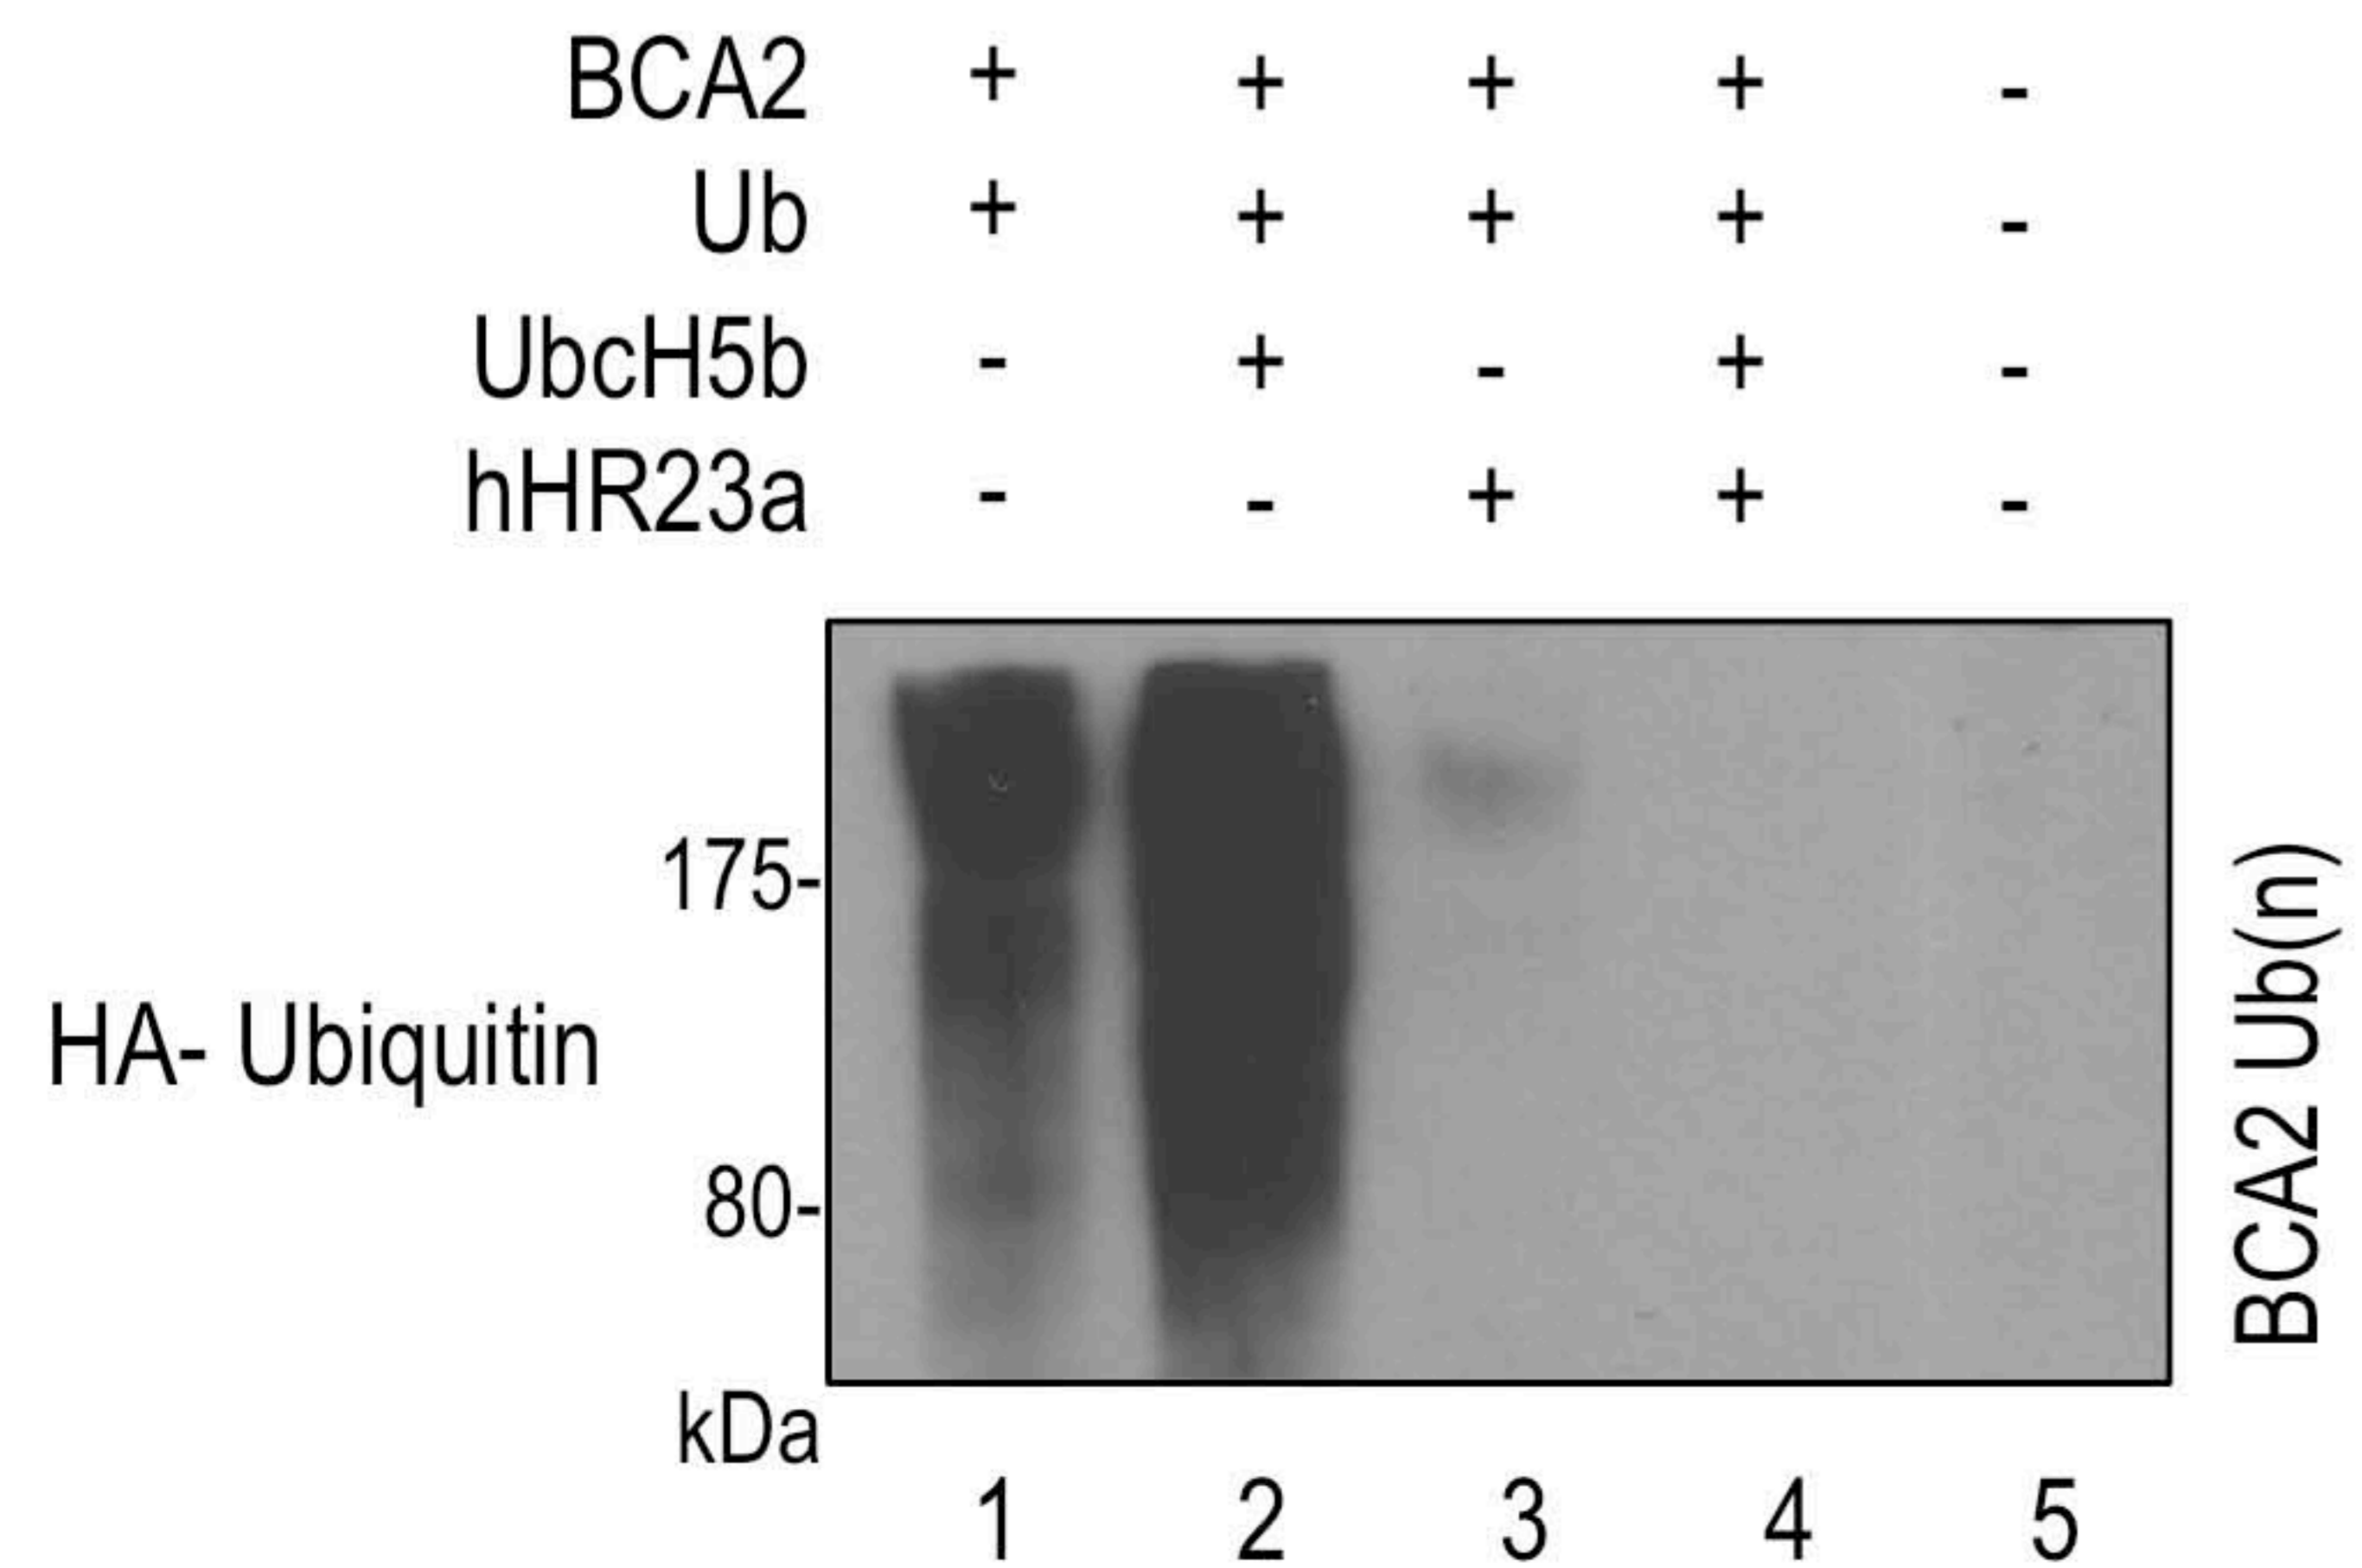

**C**

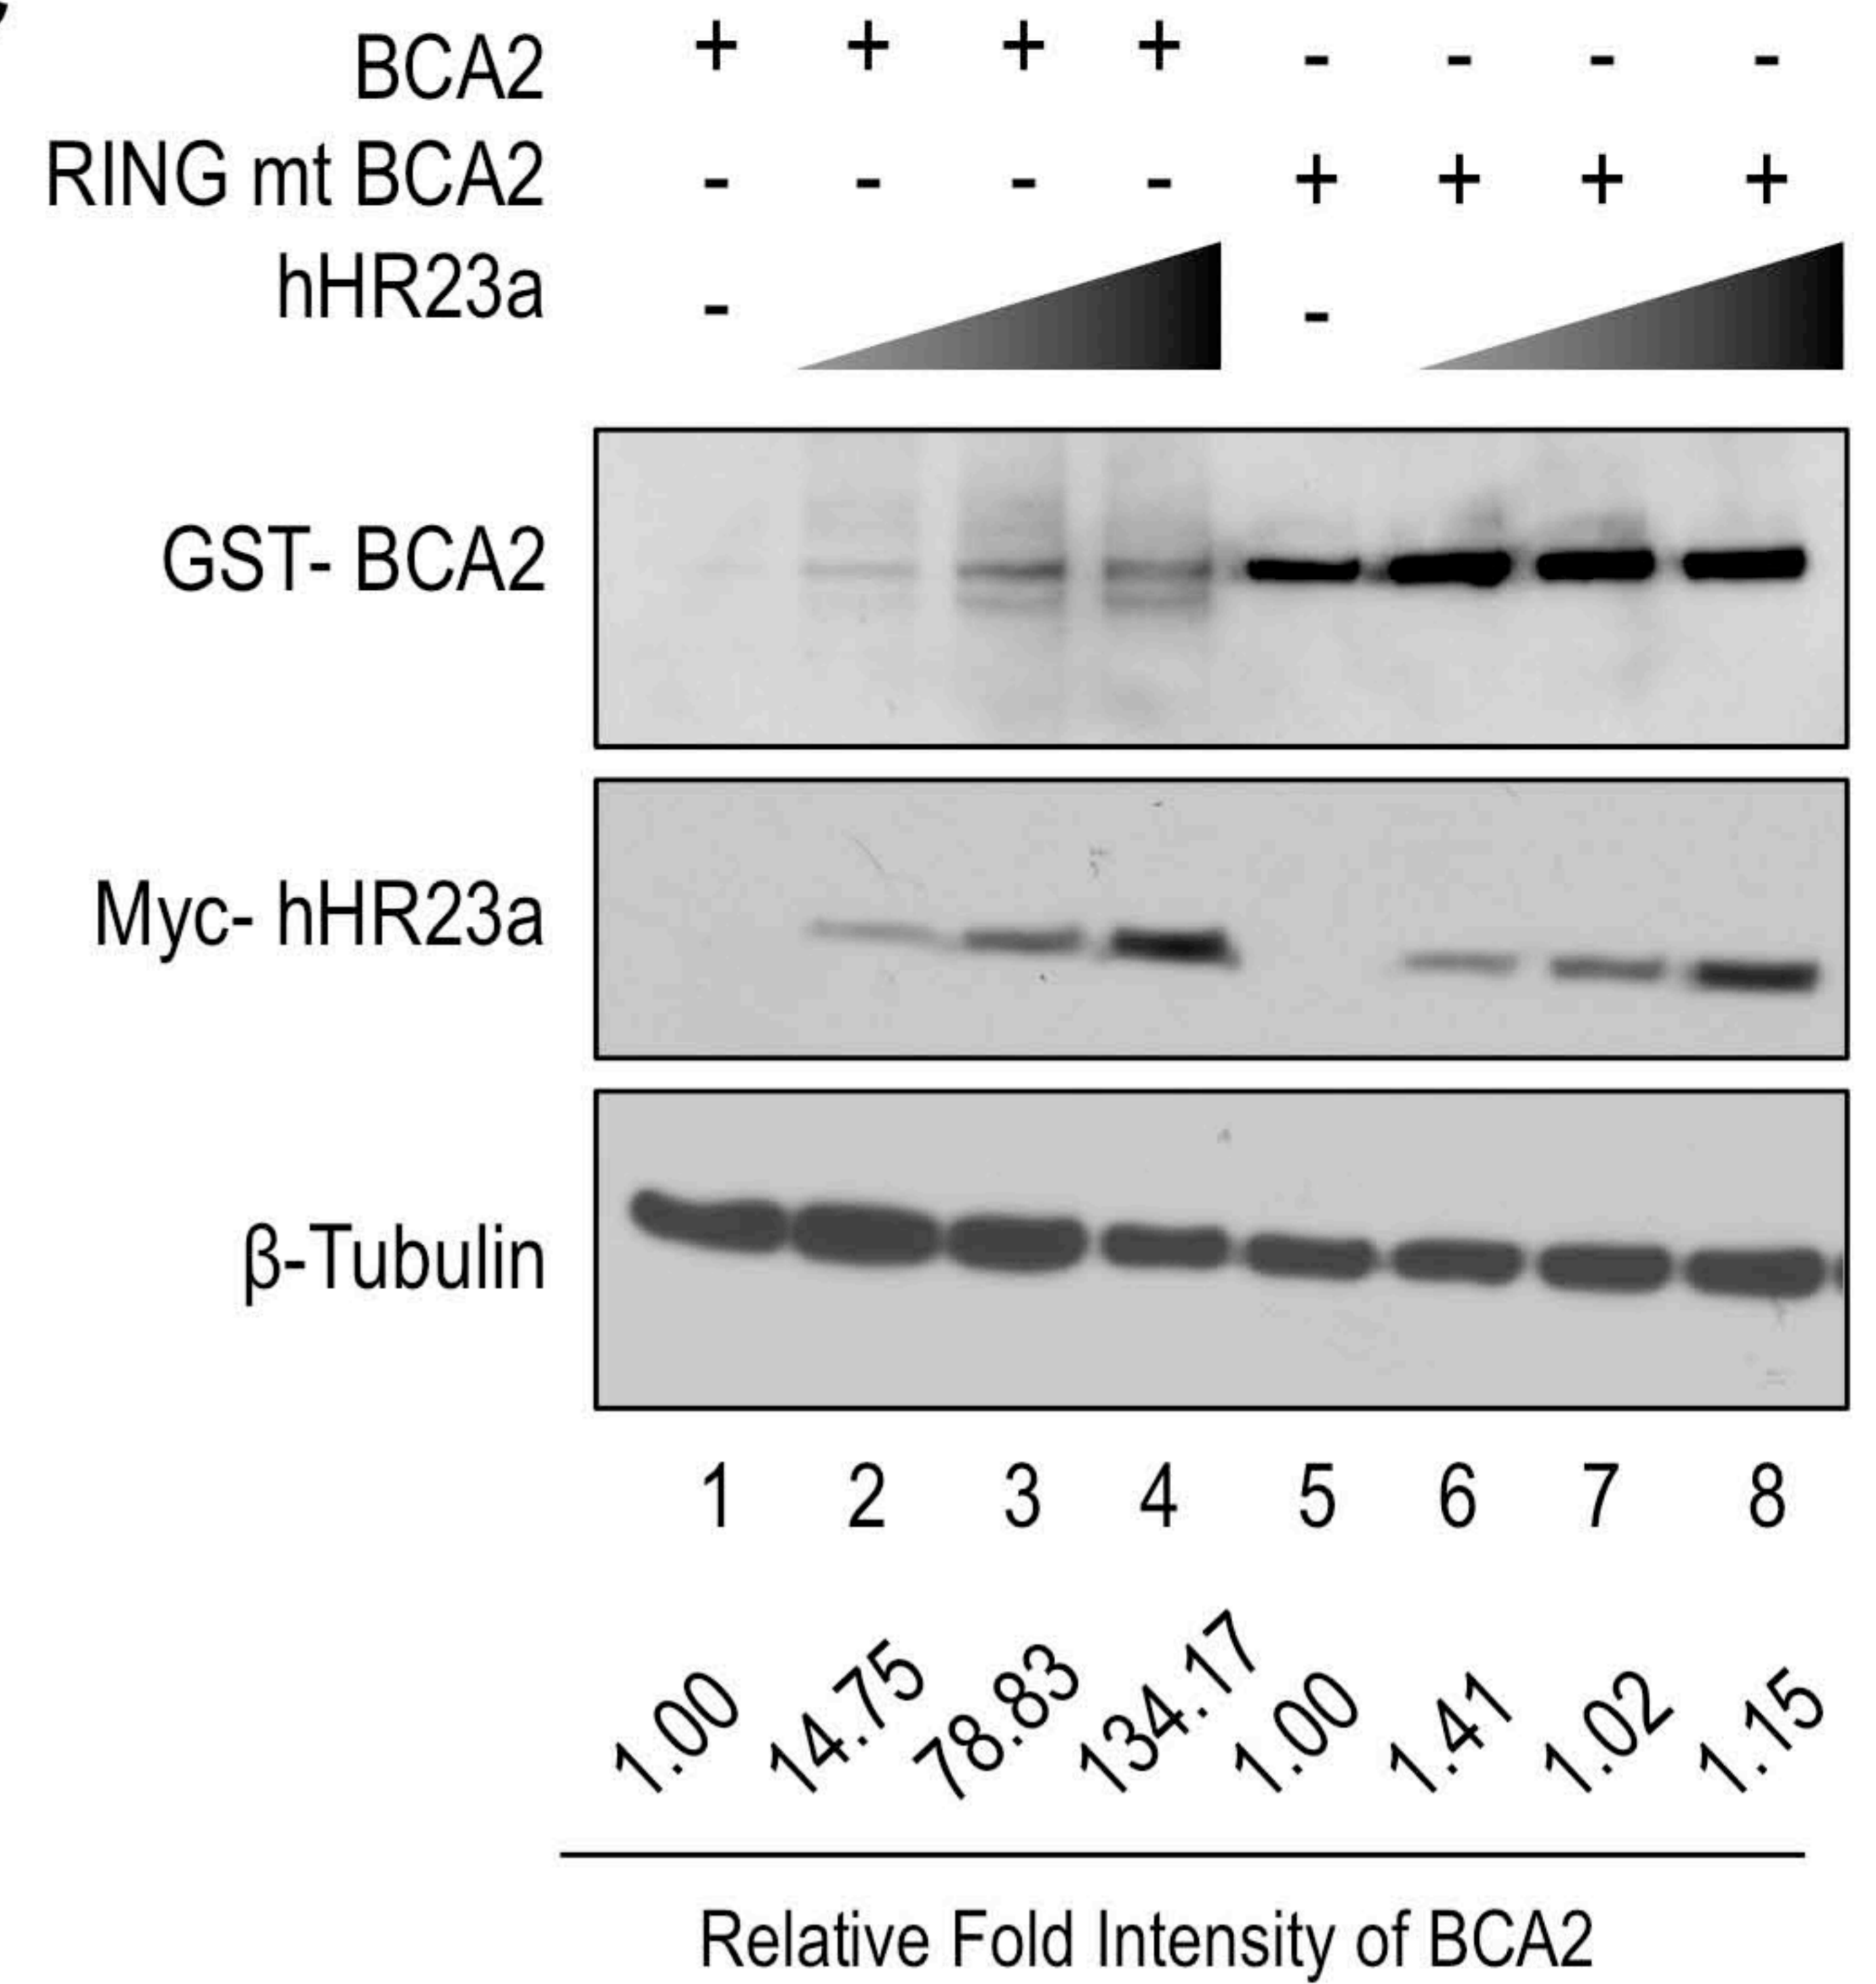

**D**

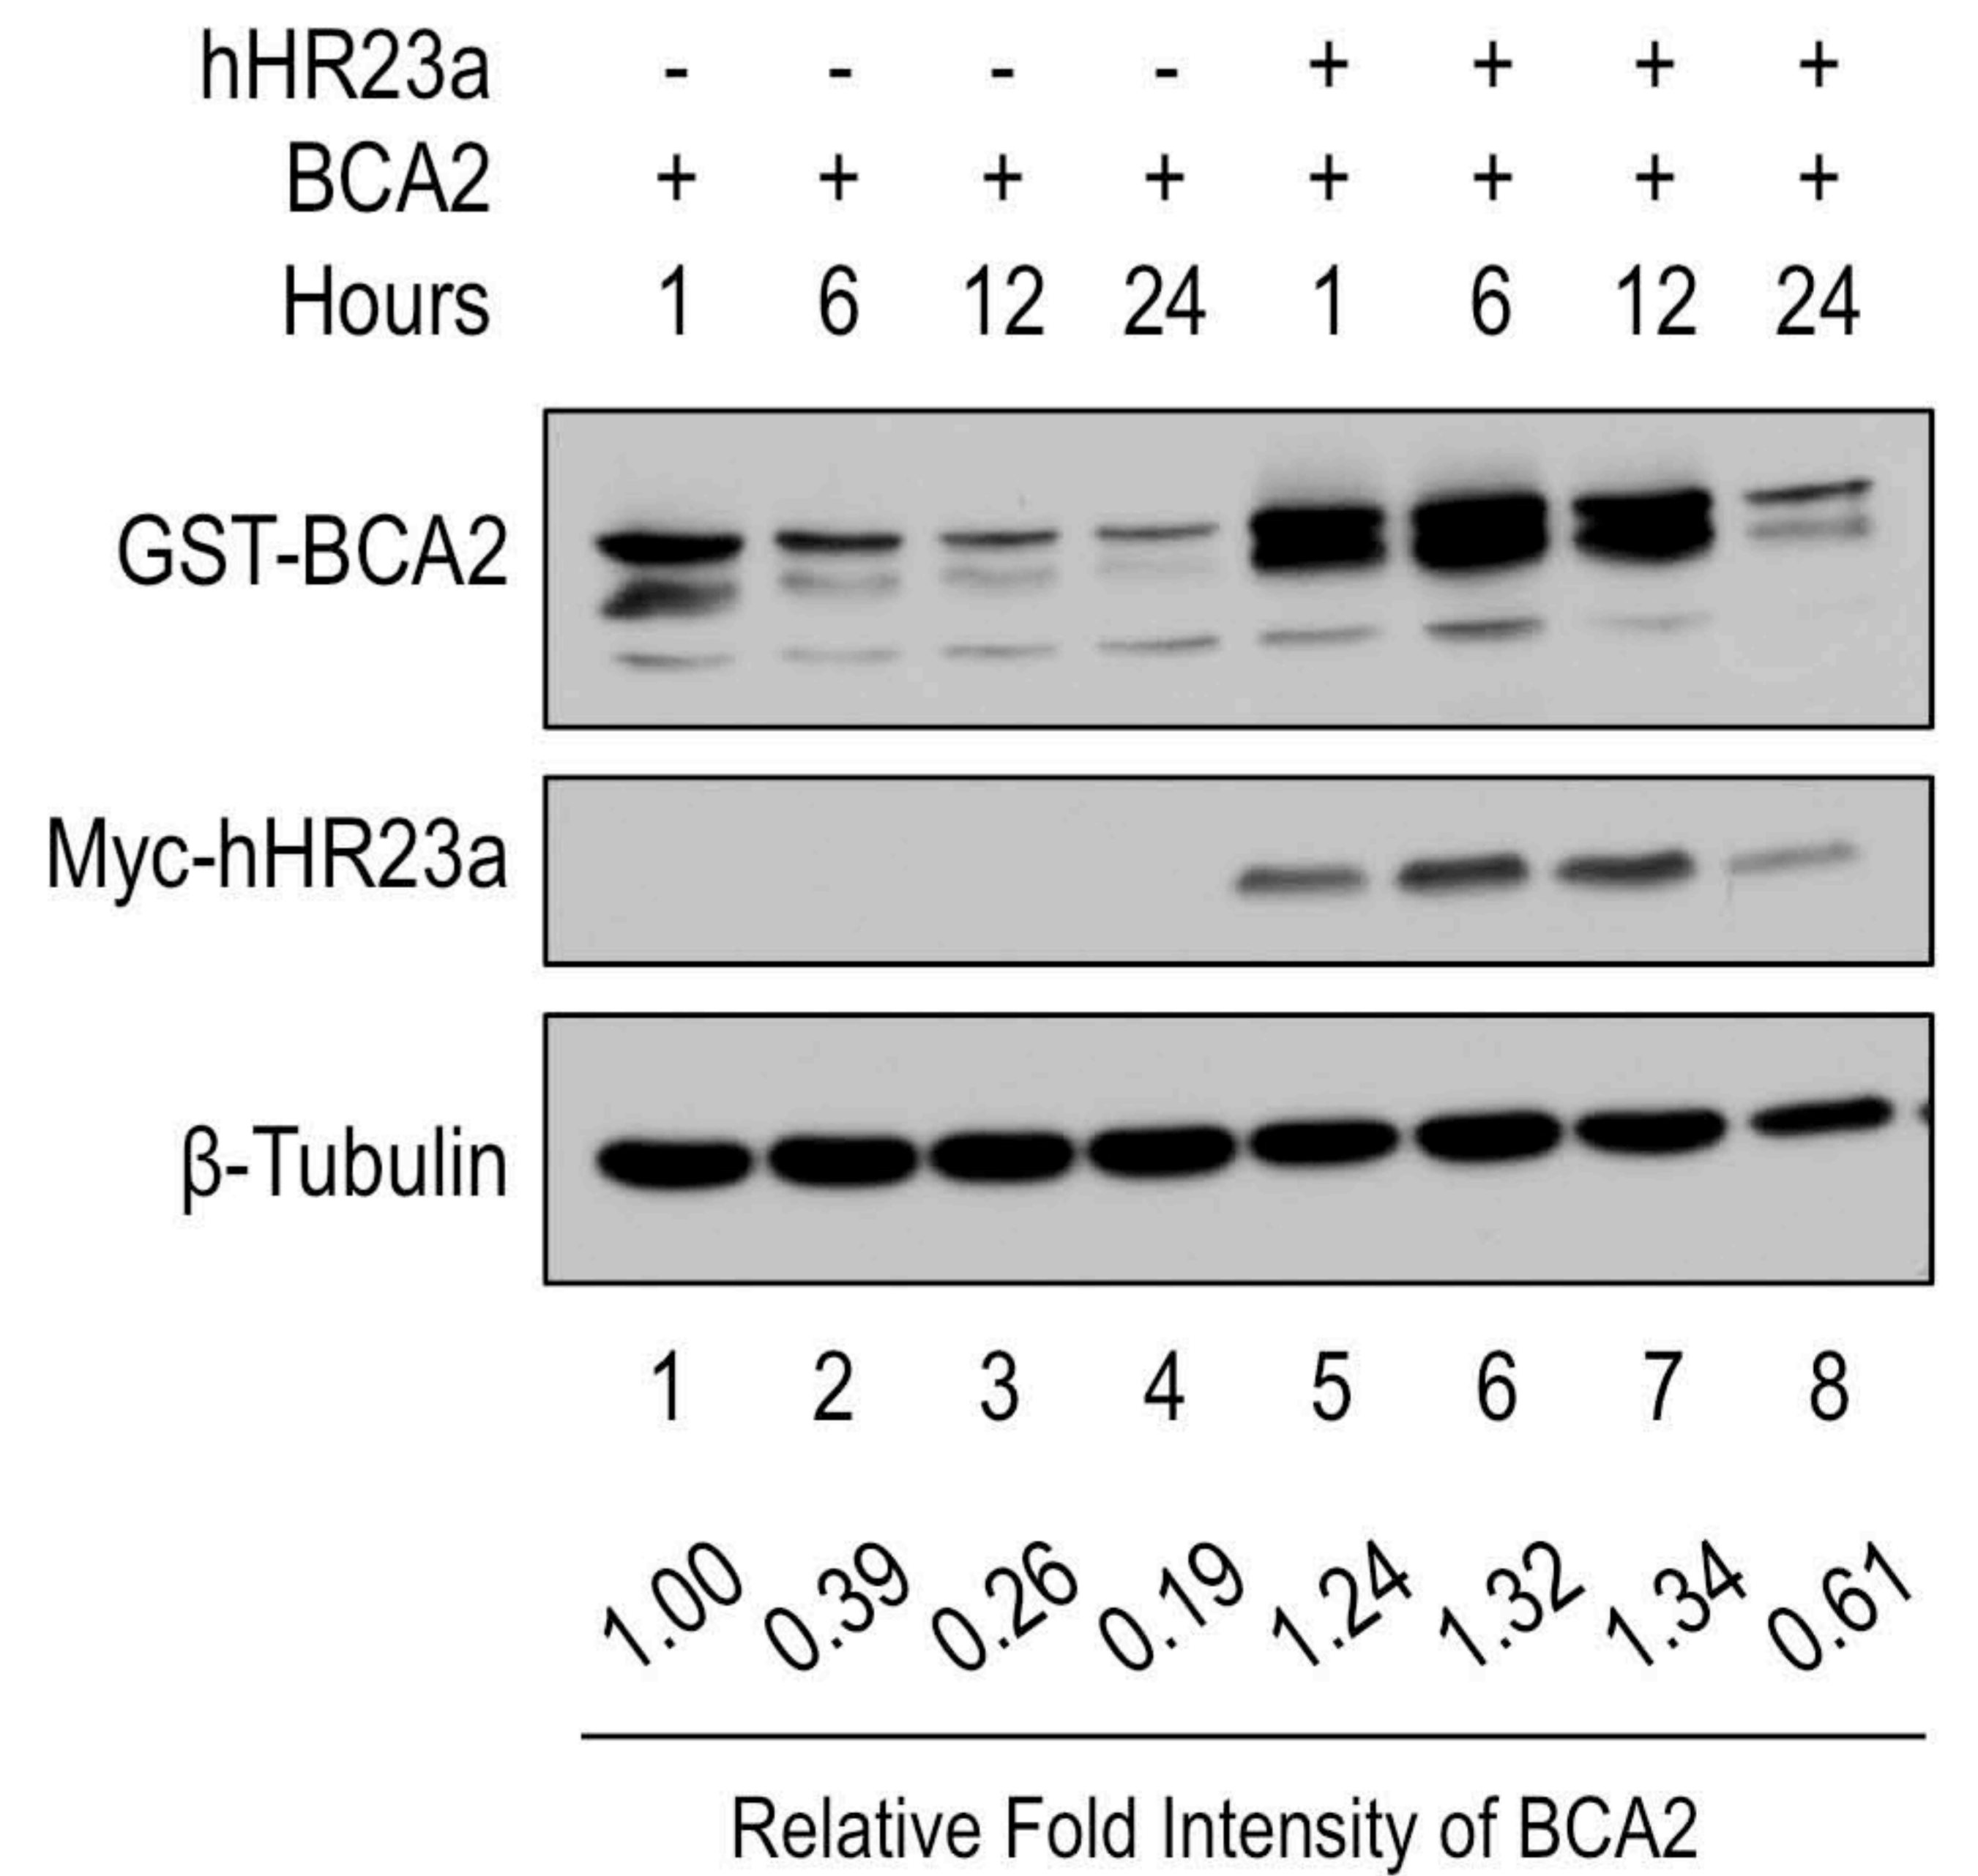

Supplement: MOESM4 [file 9464184]
